# Supplementary material for: [Ru(phen)2dppz]2+ luminescence reveals nanoscale variation of polarity in the cyclodextrin cavity
Source: Royal Society of Chemistry journal article supplement (doi:10.1039/c5cc09755j), 2015-12-10
Supplement: c5cc09755j1.pdf [file c5cc09755j1.pdf]

## **[Ru(phen)<sub>2</sub>dppz]<sup>2+</sup> Luminescence Reveals Nanoscale Variation of Polarity in the Cyclodextrin Cavity**

Patrick Higgs,<sup>a</sup> Andrew W. McKinley,<sup>b</sup> and Eimer M. Tuite<sup>a\*</sup>

a. Chemical Nanoscience Laboratory, School of Chemistry, Newcastle University, Newcastle upon Tyne, NE1 7RU, UK.

b: Department of Chemistry, Imperial College London, London SW7 2AZ, UK.

E-mail: a.mckinley@imperial.ac.uk

\* Corresponding author. Fax: +44 (0)191 2226929; Tel: +44 (0)191 2225523; E-mail: eimer.tuite@ncl.ac.uk

### **Supporting Information**

## MATERIALS AND METHODS

The  $\Delta$ - and  $\Lambda$ -enantiomers of [Ru(phen)<sub>2</sub>dppz]Cl<sub>2</sub>, [Ru(bpy)<sub>2</sub>dppz]Cl<sub>2</sub>, [Ru(bpy)<sub>3</sub>]Cl<sub>2</sub>, and [Ru(phen)<sub>3</sub>]Cl<sub>2</sub> were prepared and purified as previously described [C. Hiort, P. Lincoln, B. Nordén, J. Am. Chem. Soc. 115 (1993) 3448-3454; P. Lincoln, B. Nordén, J. Phys. Chem. B 102 (1998) 9583-9594]. Luminescence excitation spectroscopy was used to establish that emissive impurities made no contribution above baseline emission. Enantiomeric purity was established by CD spectroscopy (Jasco J-720). The concentrations of ruthenium complexes were determined using the following extinction coefficients in water: [Ru(phen)<sub>2</sub>dppz]<sup>2+</sup>,  $\epsilon(439 \text{ nm}) = 20,000 \text{ M}^{-1} \text{ cm}^{-1}$ ; [Ru(bpy)<sub>2</sub>dppz]<sup>2+</sup>,  $\epsilon(444 \text{ nm}) = 16,100 \text{ M}^{-1} \text{ cm}^{-1}$ ; [Ru(phen)<sub>3</sub>]<sup>2+</sup>,  $\epsilon(445 \text{ nm}) = 19,000 \text{ M}^{-1} \text{ cm}^{-1}$ ; [Ru(bpy)<sub>3</sub>]<sup>2+</sup>,  $\epsilon(452 \text{ nm}) = 14,600 \text{ M}^{-1} \text{ cm}^{-1}$ .

$\beta$ -cyclodextrin hydrate (Sigma, 99%) and  $\beta$ -cyclodextrin phosphate sodium salt (Sigma,  $\geq 95\%$ , 2-6 mol phosphate per mol cyclodextrin) and  $\gamma$ -cyclodextrin (Sigma,  $\geq 98\%$ ) were used as received. Concentrations were determined by mass, and the average  $\beta$ -cyclodextrin phosphate sodium salt molar mass was calculated with 4 mol phosphate per mol cyclodextrin.

All experiments were carried out in ultrapure water. Absorption spectra were recorded with a Cary 100-Bio UV/vis spectrometer. Emission and excitation spectra were recorded on a SPEX Fluoromax spectrofluorimeter. Emission lifetimes were measured by single-photon counting with excitation at 405 nm and emission at 625 nm.

Binding constants at low  $[\beta\text{-P}_n\text{CD}]/[\text{Ru}]$  ratios were estimated using the Benesi-Hildebrand method, assuming 1:1 stoichiometry using Equation (1) for absorbance and Equation (2) for emission [H.A. Benesi, J.H. Hildebrand, J. Am. Chem. Soc. 71 (1949) 2703-2707].

$$\frac{1}{A - A_0} = \frac{1}{K(A_\infty - A_0)} \cdot \frac{1}{[\text{CD}]_0} + \frac{1}{(A_\infty - A_0)} \quad (1)$$

$$\frac{1}{F - F_0} = \frac{1}{K(F_\infty - F_0)} \cdot \frac{1}{[\text{CD}]_0} + \frac{1}{(F_\infty - F_0)} \quad (2)$$

where A is absorbance, F is emission intensity, and K is the equilibrium constant for association of the ruthenium complex with  $\beta\text{-P}_n\text{CD}$ . When  $1/(A - A_0)$  or  $1/(F - F_0)$  is plotted against  $1/[\text{CD}]_0$ , the binding constant equates to y-intercept/gradients.

Stern-Volmer analysis was applied to emission data to determine rate constants for quenching of the ruthenium complexes by oxygen using Equation (3).

$$\frac{F_0}{F} = 1 + k_q \tau_0 [\text{Q}] \quad (3)$$

where  $\tau_0$  is the lifetime in the absence of quencher. The concentrations of oxygen in water are 0.3 mM in air and 0.0 mM under inert gas [“Handbook of Photochemistry” M. Montalti, A. Credi, L. Prodi, M. T. Gandolfi, 3<sup>rd</sup> Edn. (Taylor & Francis) 2006.]. These values were used both in the absence and presence of  $\beta\text{-P}_n\text{CD}$ .

## ADDITIONAL EXPERIMENTAL DATA

**Table S1.** Emission lifetimes and emission spectral maxima of  $\Delta$ -[Ru(phen)<sub>2</sub>dppz]<sup>2+</sup> in air at 293-298 K.

| solvent               | $\lambda_{\max}$ / nm | $\tau$ / ns (air) | $\tau$ / ns (Ar) |
|-----------------------|-----------------------|-------------------|------------------|
| dimethylformamide [1] | 663                   | 181               | 255              |
| acetonitrile [1]      | 634                   | 174               | 213              |
| ethanol [1]           | 619                   | 153               | 175              |
| 1,2-propanediol [2]   | 620                   | -                 | 86               |
| methanol [1]          | 627                   | 27                | 29               |
| 1,3-propanediol [2]   | 620                   | -                 | 27               |
| formamide [1]         | 660                   | 13                | 12               |
| glycerol [2]          | 639                   | -                 | 8.2              |
| ethylene glycol [2]   | 656                   | -                 | 7.5              |
| water [3]             | 800                   | -                 | 0.8              |
| <b>polymer</b>        |                       | -                 |                  |
| poly(dA) [4]          | 650                   | 5/67/216          | -                |
| poly(dT) [4]          | 647                   | 7/84/248          | -                |

- [1] A.W. McKinley, PhD Thesis, University of Newcastle upon Tyne, 2008. *Photophysics of Light Switch Ruthenium Complex and Their Interactions with DNA*.
- [2] J. Olofsson, L.M. Wilhelmsson, P. Lincoln, *J. Am. Chem. Soc.* 126 (2004) 15458-15465.
- [3] E.J.C. Olson, D. Hu, A. Hormann, A.M. Jonkman, M.R. Arkin, E.D.A. Stemp, J.K. Barton, P.F. Barbara, *J. Am. Chem. Soc.* 119 (1997) 11458-11467.
- [4] J.M. Moon, J.-M. Lee, J.Y. Choi, H.M. Lee, S.K. Kim, *J. Inorg. Biochem.* 101 (2007) 1386-1393.

**Table S2.** Equilibrium constants for initial interaction with  $\beta$ -P<sub>n</sub>CD using Benesi-Hildebrand method, assuming formation of a 1:1 complex.

|        | $\Delta$ -[Ru(phen) <sub>2</sub> dppz] <sup>2+</sup> | $\Delta$ -[Ru(phen) <sub>2</sub> dppz] <sup>2+</sup> | $\Delta$ -[Ru(bpy) <sub>2</sub> dppz] <sup>2+</sup> | $\Delta$ -[Ru(phen) <sub>3</sub> ] <sup>2+</sup> | $\Delta$ -[Ru(bpy) <sub>3</sub> ] <sup>2+</sup> |
|--------|------------------------------------------------------|------------------------------------------------------|-----------------------------------------------------|--------------------------------------------------|-------------------------------------------------|
| abs    | $3.37 \times 10^3$                                   | $1.01 \times 10^5$                                   | $5.09 \times 10^4$                                  | $5.51 \times 10^5$                               | $6.75 \times 10^5$                              |
| em     | $4.75 \times 10^3$                                   | $2.03 \times 10^4$                                   | $1.66 \times 10^4$                                  | $1.19 \times 10^4$                               | $1.07 \times 10^5$                              |
| av     | <b><math>4.06 \times 10^3</math></b>                 | <b><math>6.07 \times 10^4</math></b>                 | <b><math>3.38 \times 10^4</math></b>                | <b><math>2.81 \times 10^5</math></b>             | <b><math>3.91 \times 10^5</math></b>            |
| log(K) | <b>3.61</b>                                          | <b>4.78</b>                                          | <b>4.53</b>                                         | <b>5.45</b>                                      | <b>5.59</b>                                     |

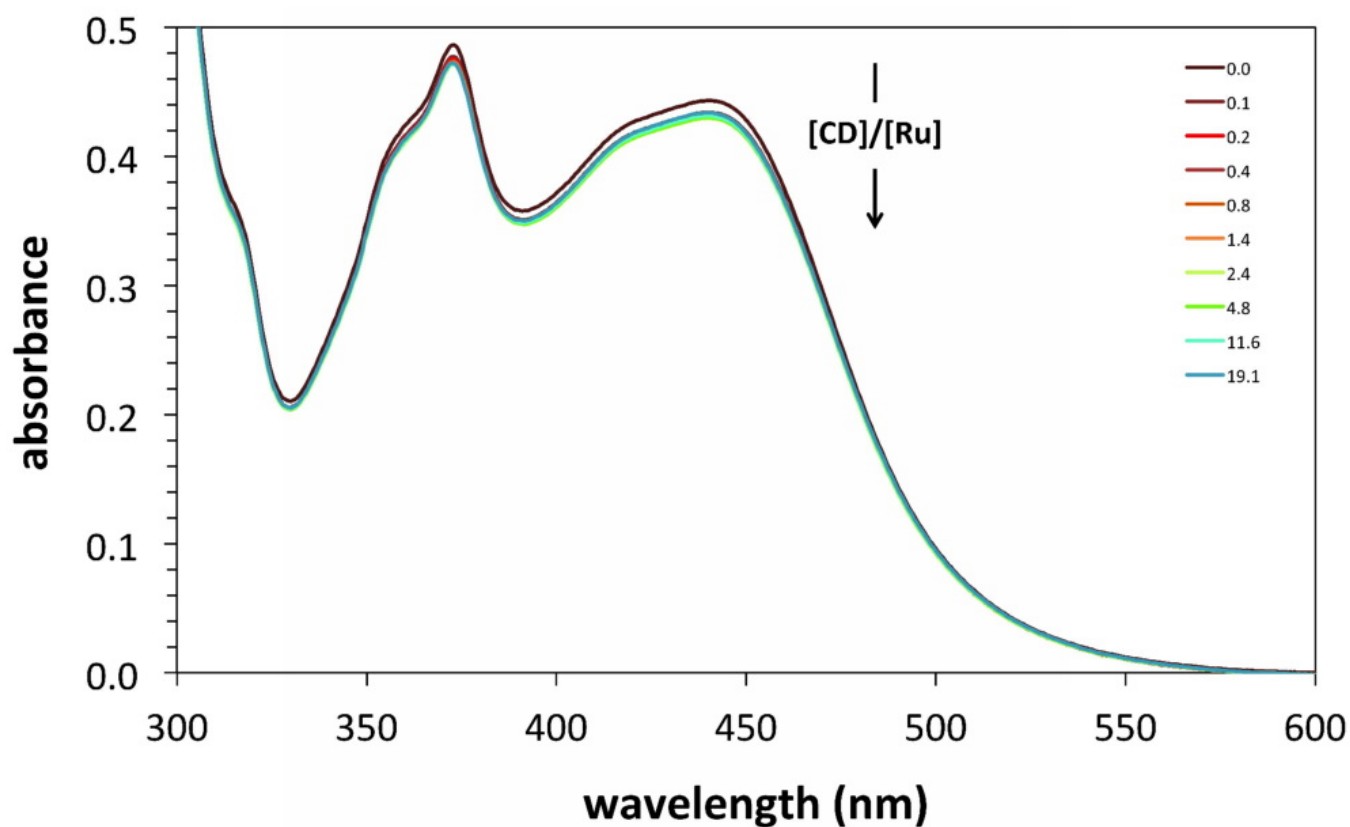

**Figure S1.** Absorption spectra of  $\Delta$ -[Ru(phen)<sub>2</sub>dppz]<sup>2+</sup> with added  $\beta$ -CD. [Ru] = 20  $\mu$ M. Legend shows  $[\beta\text{-CD}]/[\text{Ru}]$  ratios.

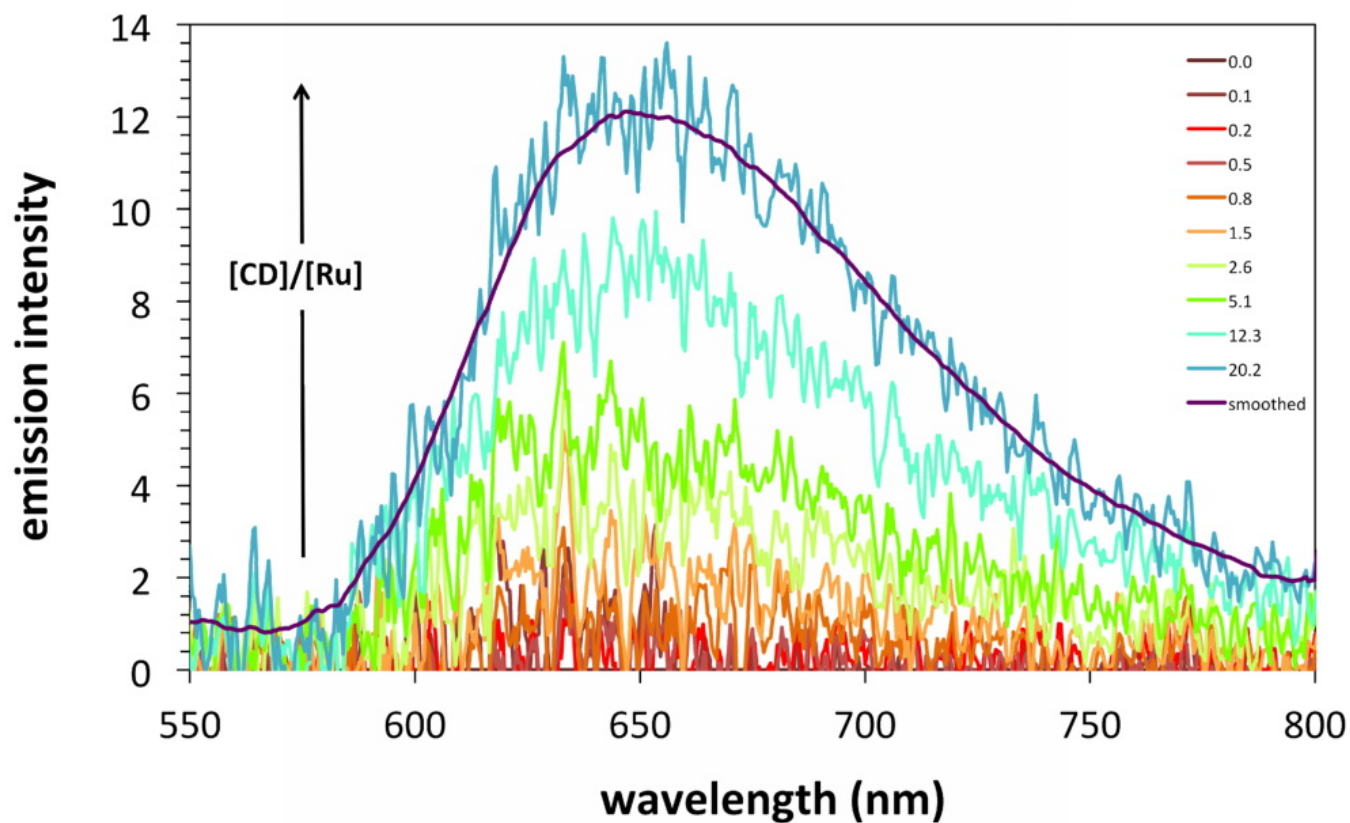

**Figure S2.** Emission spectra of  $\Delta$ -[Ru(phen)<sub>2</sub>dppz]<sup>2+</sup> with added  $\beta$ -CD.  $\lambda_{\text{ex}} = 410$  nm. [Ru] = 20  $\mu$ M. Legend shows  $[\beta\text{-CD}]/[\text{Ru}]$  ratios.

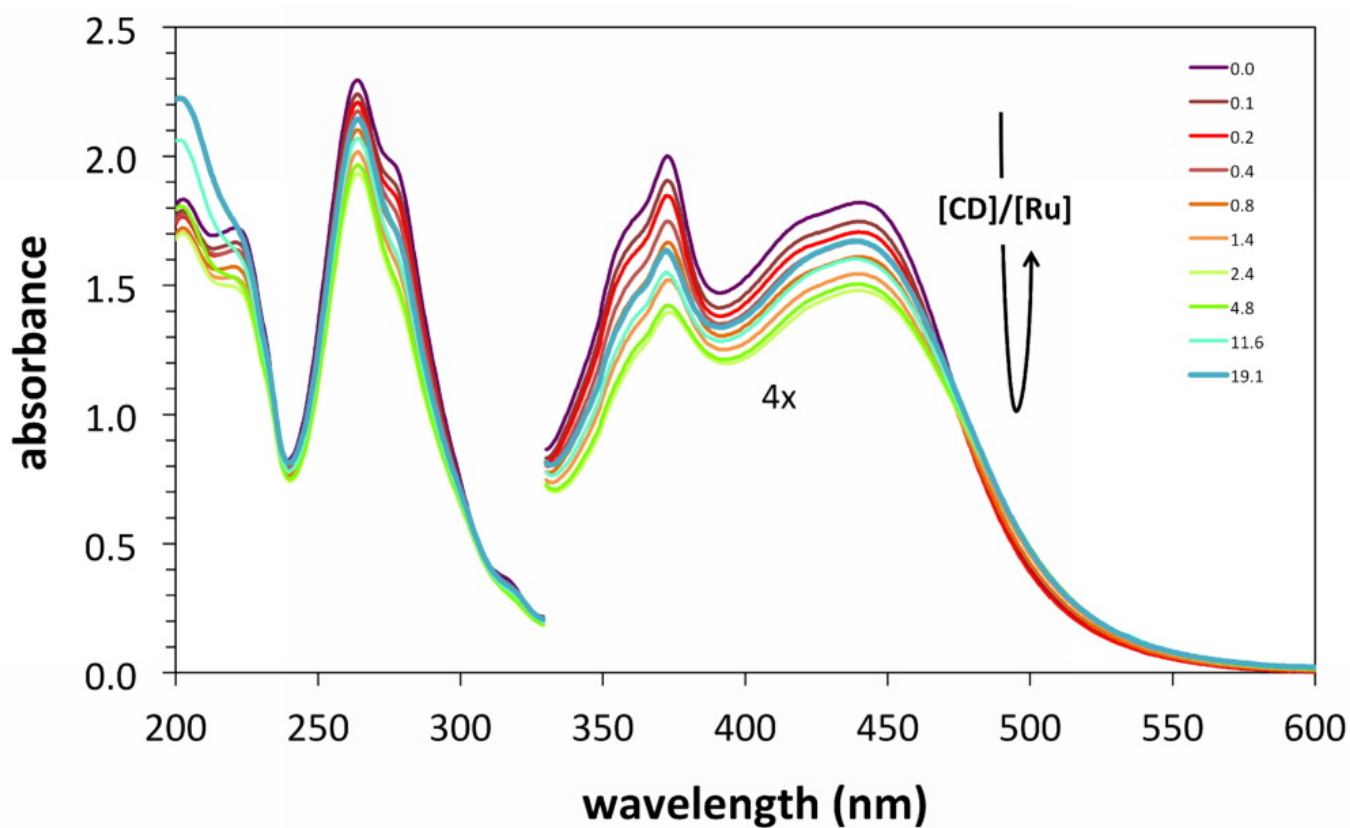

**Figure S3.** Absorption spectra of  $\Delta$ -[Ru(phen)<sub>2</sub>dppz]<sup>2+</sup> with added  $\beta$ -CD-phosphate. [Ru] = 20  $\mu\text{M}$ . Legend shows  $[\beta\text{-P}_n\text{CD}]/[\text{Ru}]$  ratios.

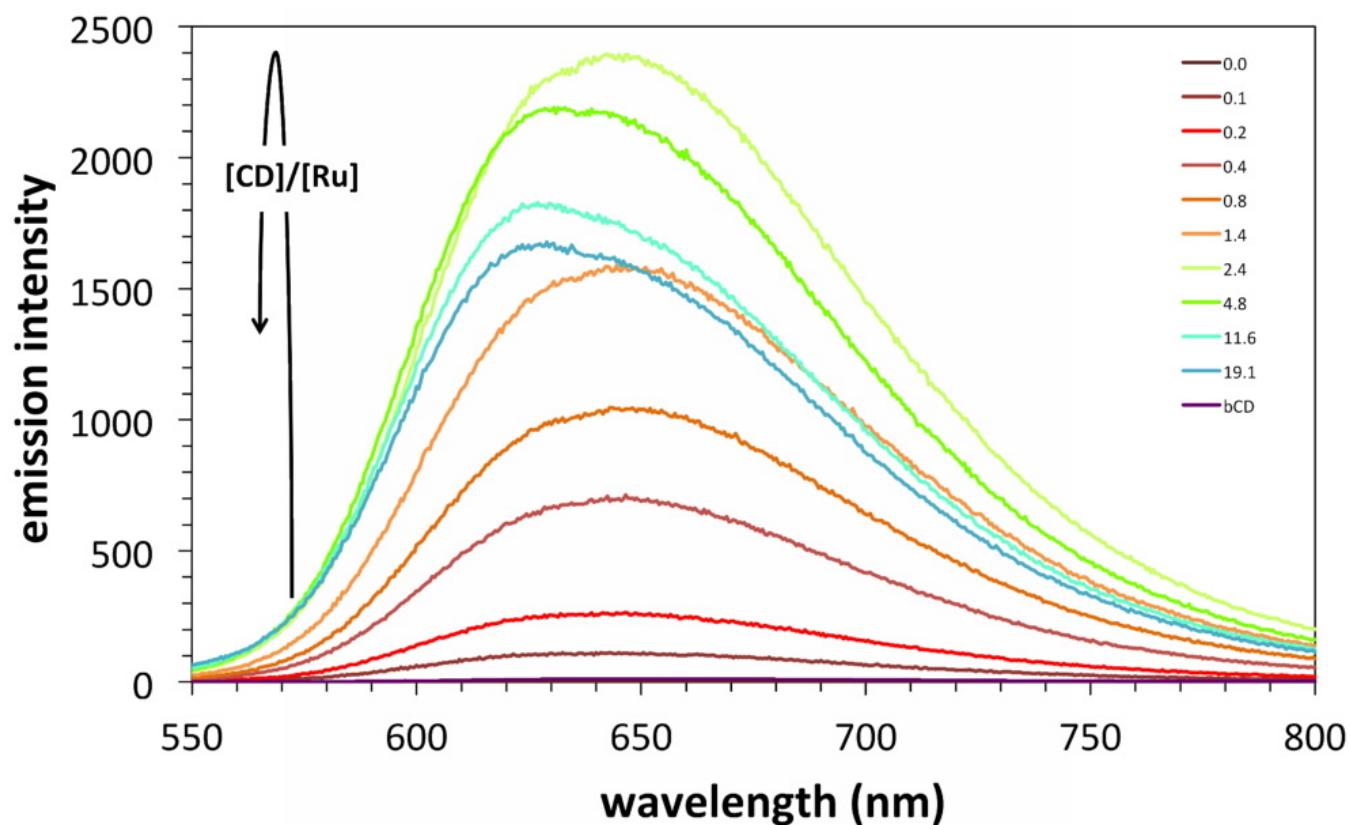

**Figure S4.** Emission spectra of  $\Delta$ -[Ru(phen)<sub>2</sub>dppz]<sup>2+</sup> with added  $\beta$ -P<sub>n</sub>CD.  $\lambda_{\text{ex}} = 475 \text{ nm}$ . [Ru] = 20  $\mu\text{M}$ . Legend shows  $[\beta\text{-P}_n\text{CD}]/[\text{Ru}]$  ratios. The spectrum with  $\beta$ -CD at a ratio of 20 is shown for comparison.

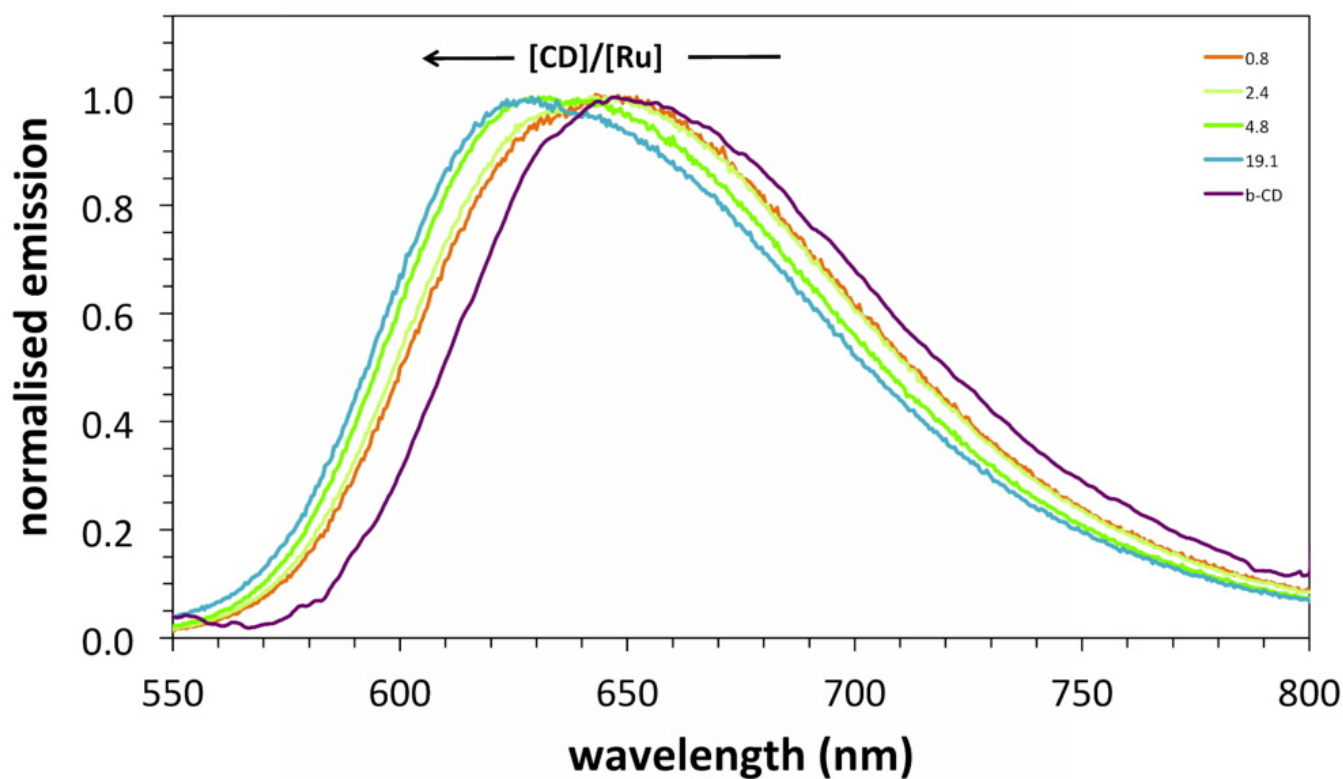

**Figure S5.** Normalised emission spectra of  $\Delta$ -[Ru(phen)<sub>2</sub>dppz]<sup>2+</sup> with added  $\beta$ -P<sub>n</sub>CD.  $\lambda_{\text{ex}} = 475$  nm. [Ru] = 20  $\mu$ M. Legend shows [ $\beta$ -P<sub>n</sub>CD]/[Ru] ratios. The spectrum with  $\beta$ -CD at a ratio of 20 is shown for comparison.

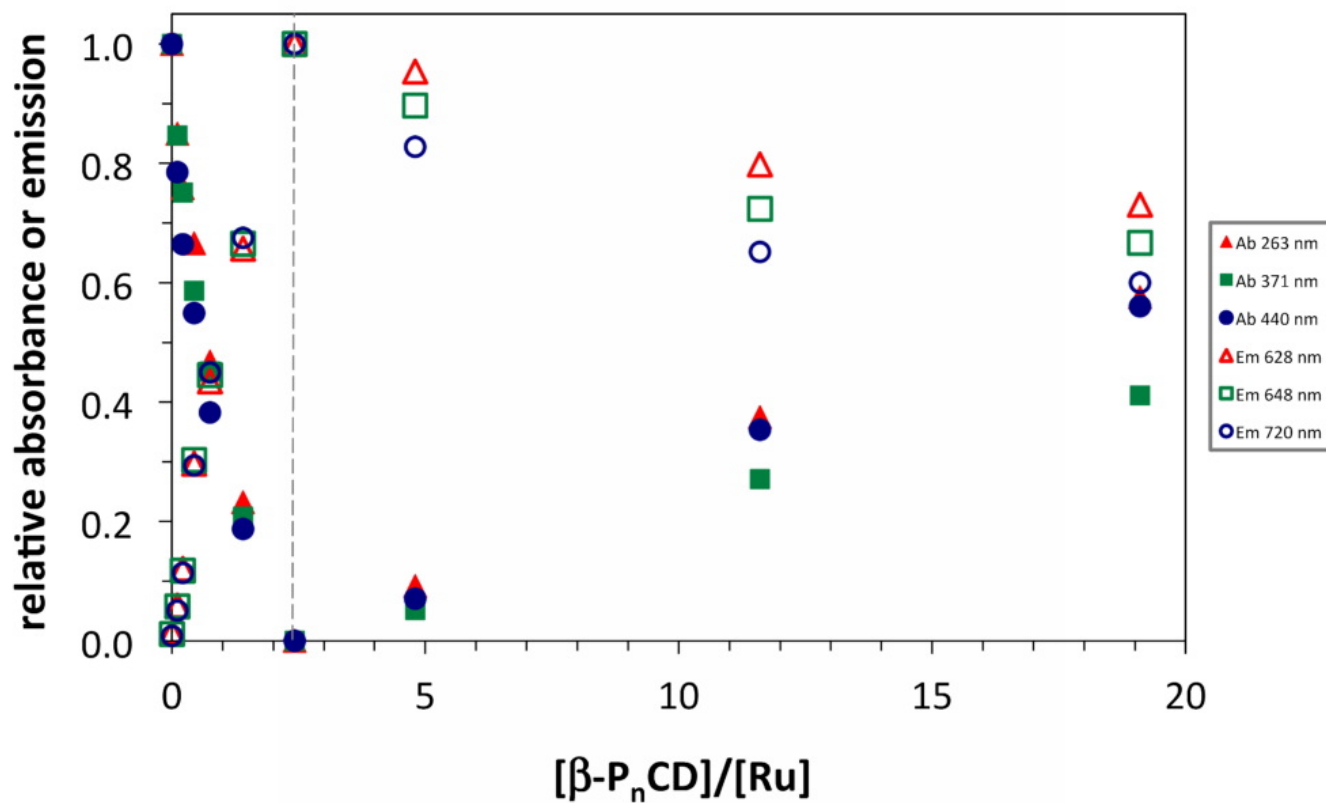

**Figure S6.** Normalized absorption and emission changes of  $\Delta$ -[Ru(phen)<sub>2</sub>dppz]<sup>2+</sup> as a function of added  $\beta$ -P<sub>n</sub>CD. [Ru] = 20  $\mu$ M. The legend shows the monitored wavelengths.

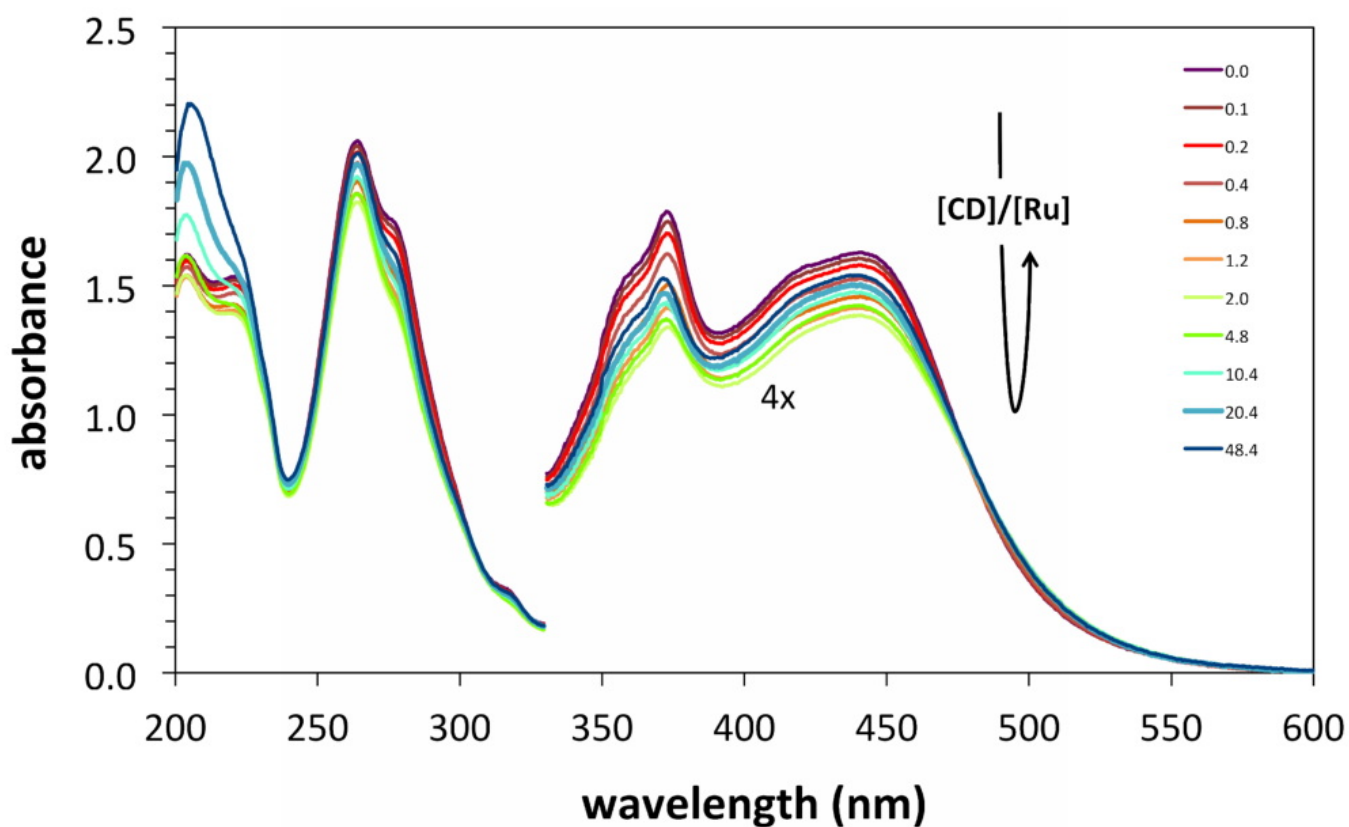

**Figure S7.** Absorption spectra of  $\Lambda$ -[Ru(phen)<sub>2</sub>dppz]<sup>2+</sup> with added  $\beta$ -CD-phosphate. [Ru] = 20  $\mu$ M. Legend shows  $[\beta\text{-P}_n\text{CD}]/[\text{Ru}]$  ratios.

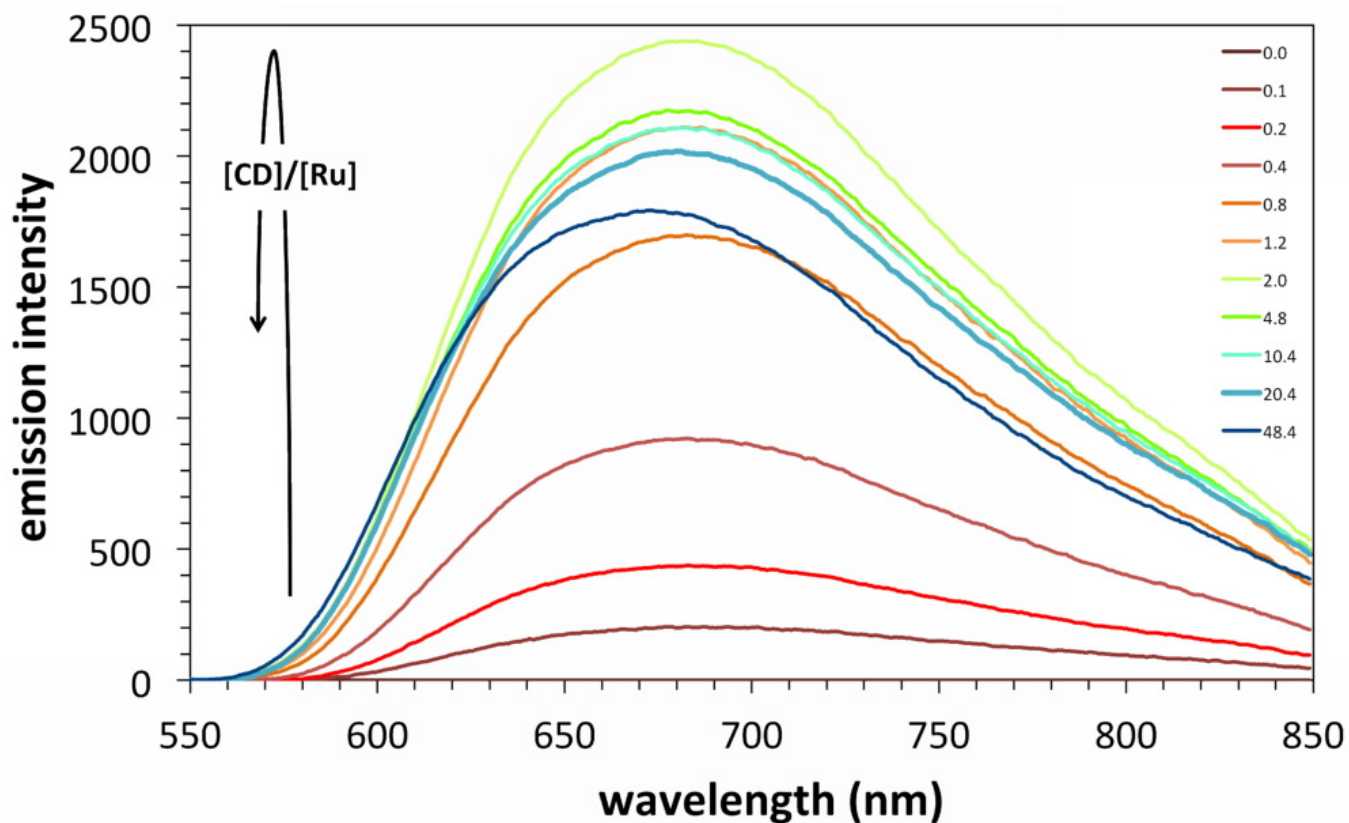

**Figure S8.** Emission spectra of  $\Lambda$ -[Ru(phen)<sub>2</sub>dppz]<sup>2+</sup> with added  $\beta$ -P<sub>n</sub>CD.  $\lambda_{\text{ex}}$  = 475 nm. [Ru] = 20  $\mu$ M. Legend shows  $[\beta\text{-P}_n\text{CD}]/[\text{Ru}]$  ratios.

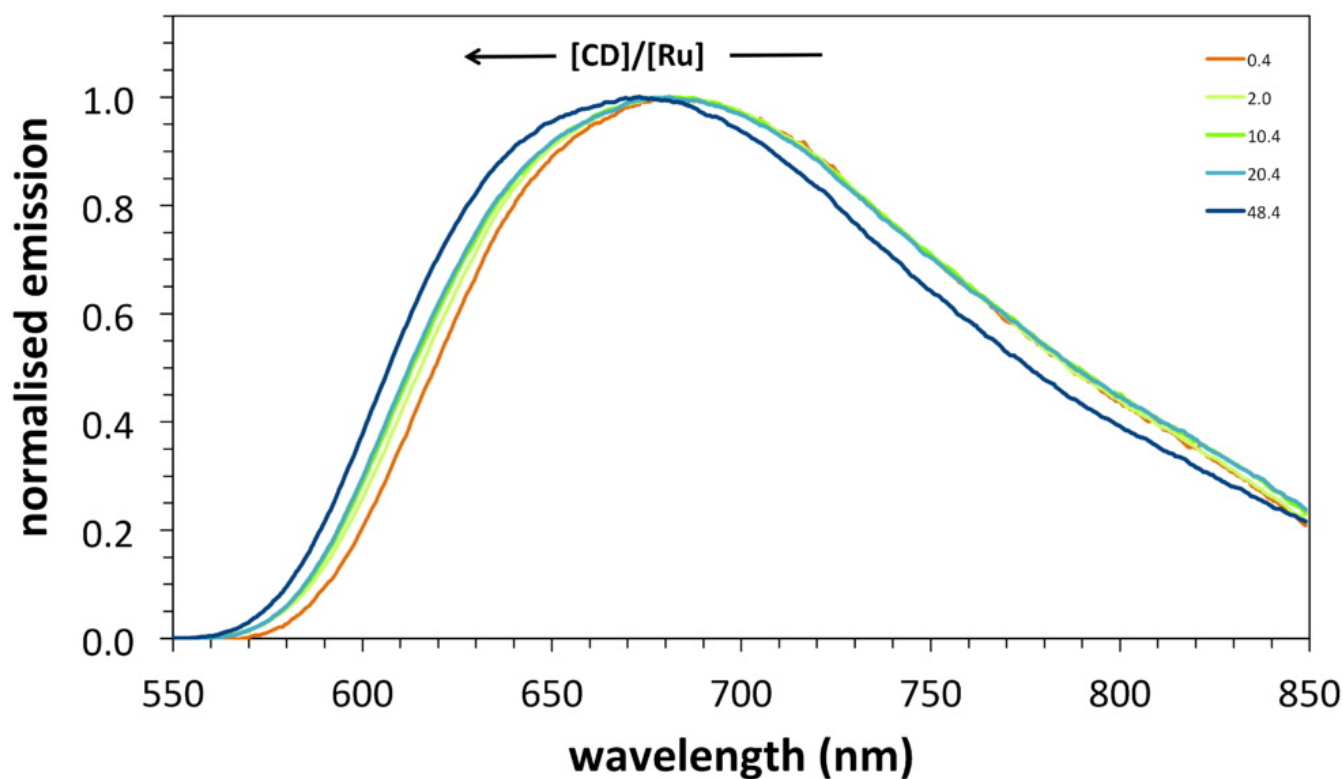

**Figure S9.** Normalised emission spectra of  $\Lambda$ -[Ru(phen)<sub>2</sub>dppz]<sup>2+</sup> with added  $\beta$ -P<sub>n</sub>CD.  $\lambda_{\text{ex}} = 475$  nm. [Ru] = 20  $\mu$ M. Legend shows [ $\beta$ -P<sub>n</sub>CD]/[Ru] ratios.

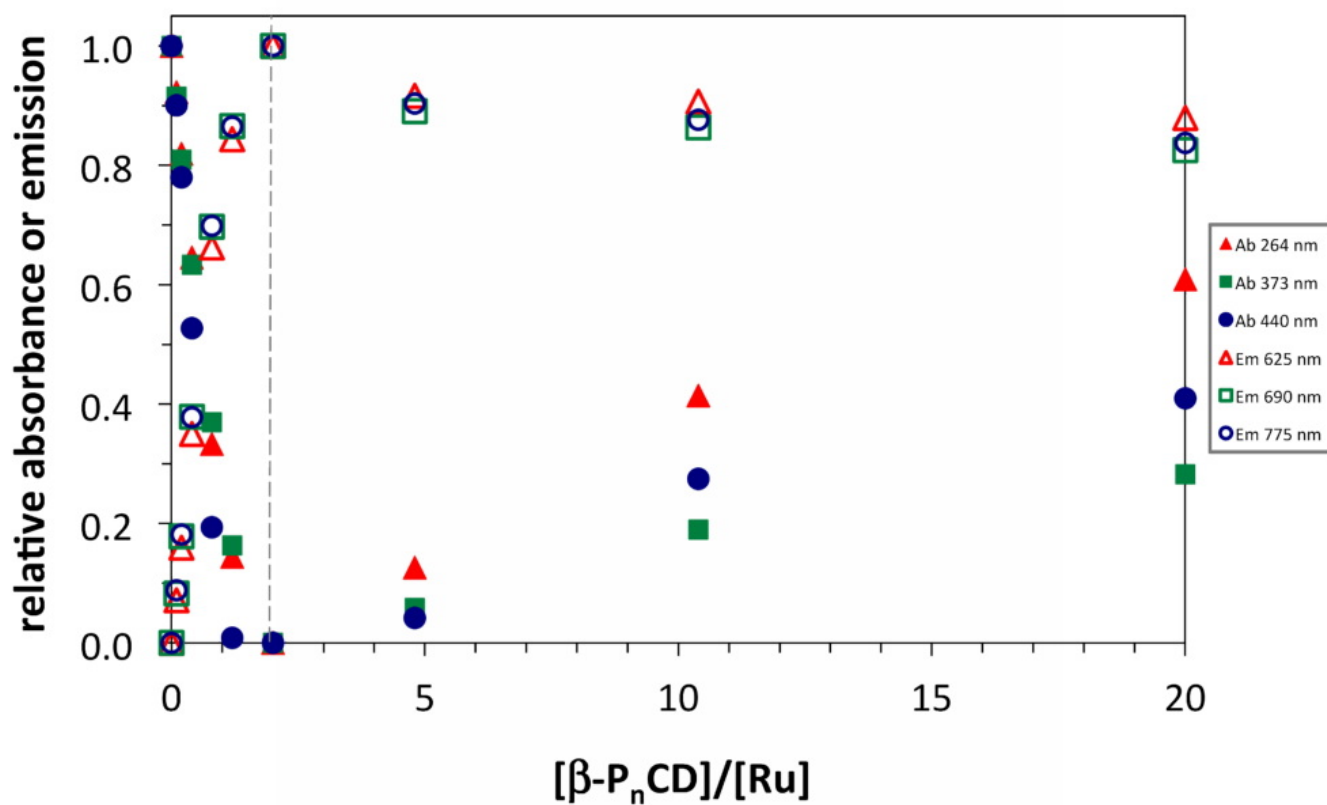

**Figure S10.** Normalized absorption and emission changes of  $\Lambda$ -[Ru(phen)<sub>2</sub>dppz]<sup>2+</sup> as a function of added  $\beta$ -P<sub>n</sub>CD. [Ru] = 20  $\mu$ M. The legend shows the monitored wavelengths.



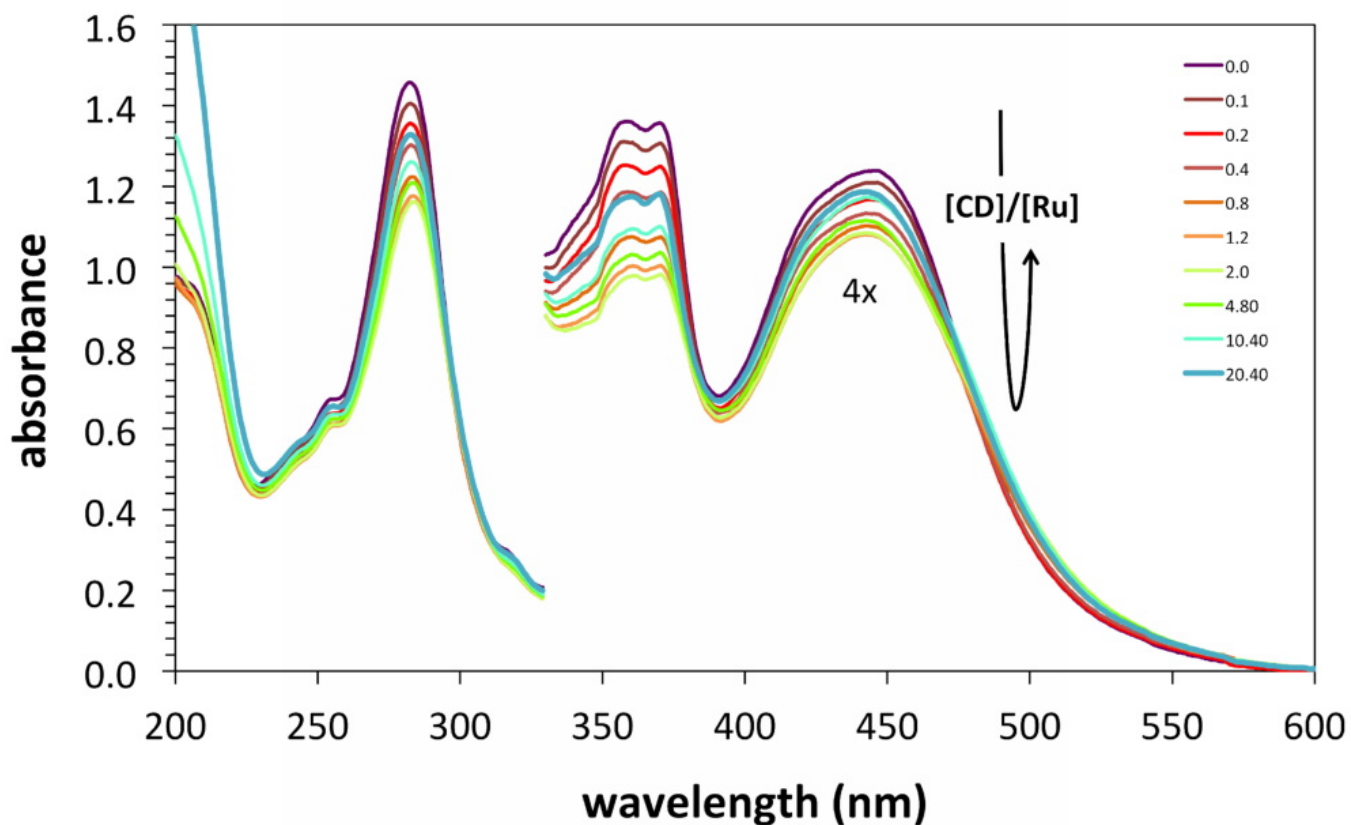

**Figure S11.** Absorption spectra of  $\Delta$ -[Ru(bpy)<sub>2</sub>dppz]<sup>2+</sup> with added  $\beta$ -CD-phosphate. [Ru] = 20  $\mu$ M. Legend shows  $[\beta\text{-P}_n\text{CD}]/[\text{Ru}]$  ratios.

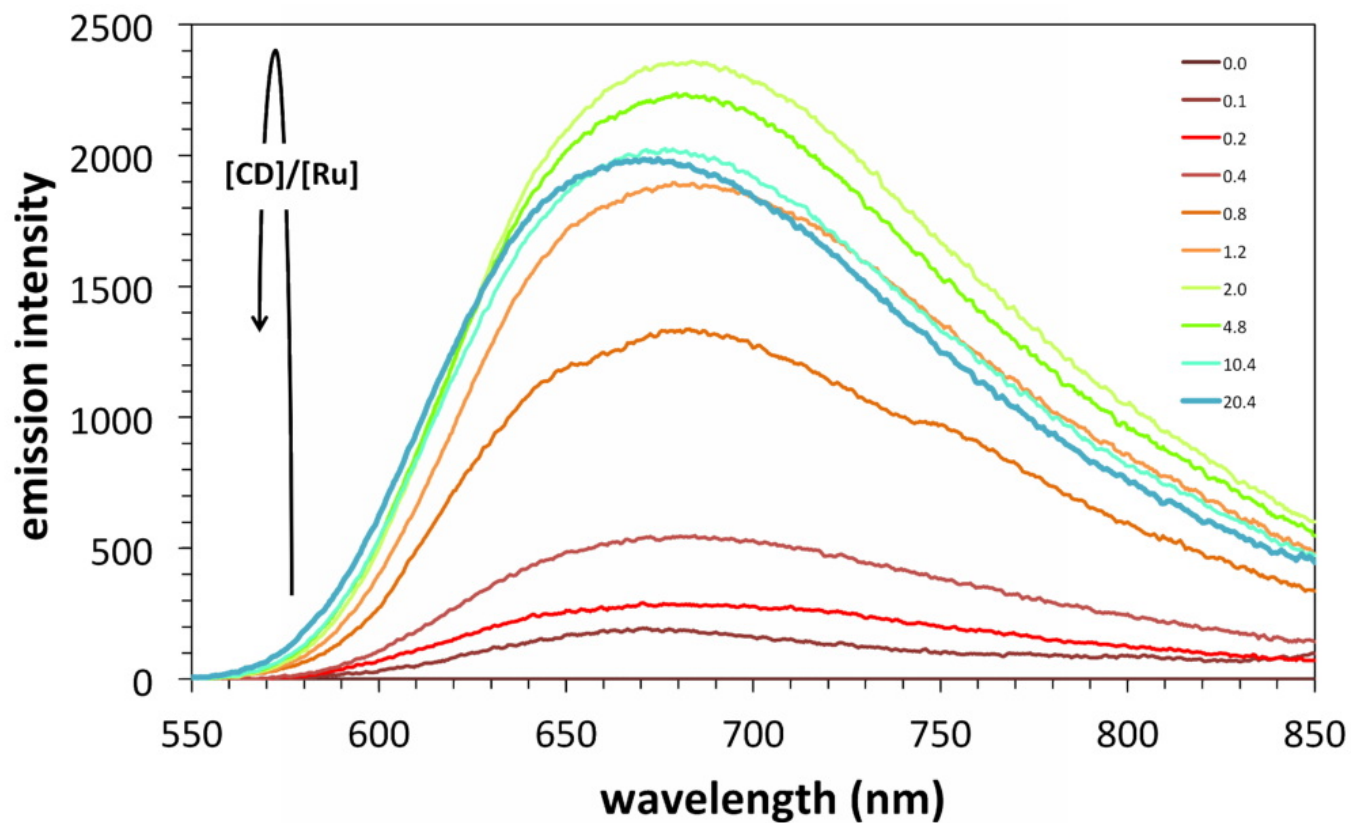

**Figure S12.** Emission spectra of  $\Delta$ -[Ru(bpy)<sub>2</sub>dppz]<sup>2+</sup> with added  $\beta$ -P<sub>n</sub>CD.  $\lambda_{\text{ex}} = 470$  nm. [Ru] = 20  $\mu$ M. Legend shows  $[\beta\text{-P}_n\text{CD}]/[\text{Ru}]$  ratios.

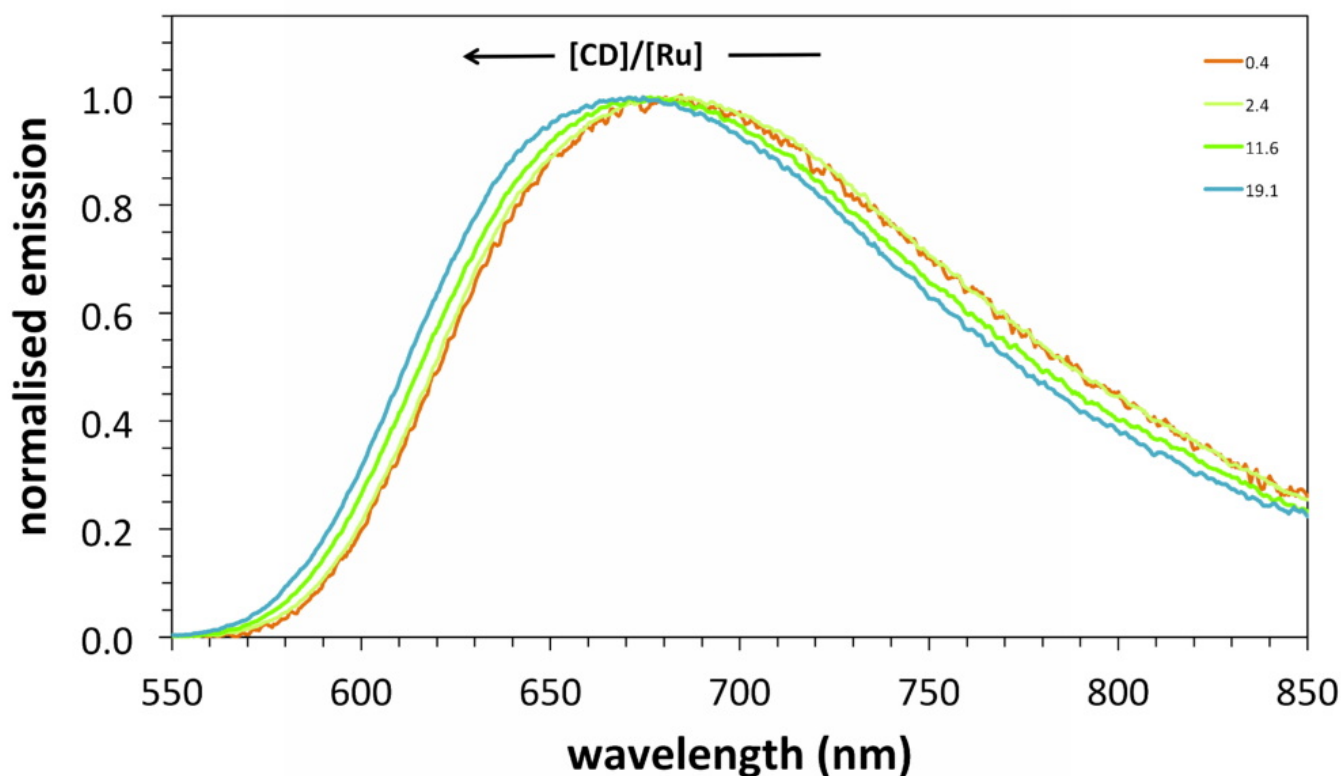

**Figure S13.** Normalised emission spectra of  $\Delta$ -[Ru(bpy)<sub>2</sub>dppz]<sup>2+</sup> with added  $\beta$ -P<sub>n</sub>CD.  $\lambda_{\text{ex}} = 470$  nm. [Ru] = 20  $\mu$ M. Legend shows  $[\beta\text{-P}_n\text{CD}]/[\text{Ru}]$  ratios.

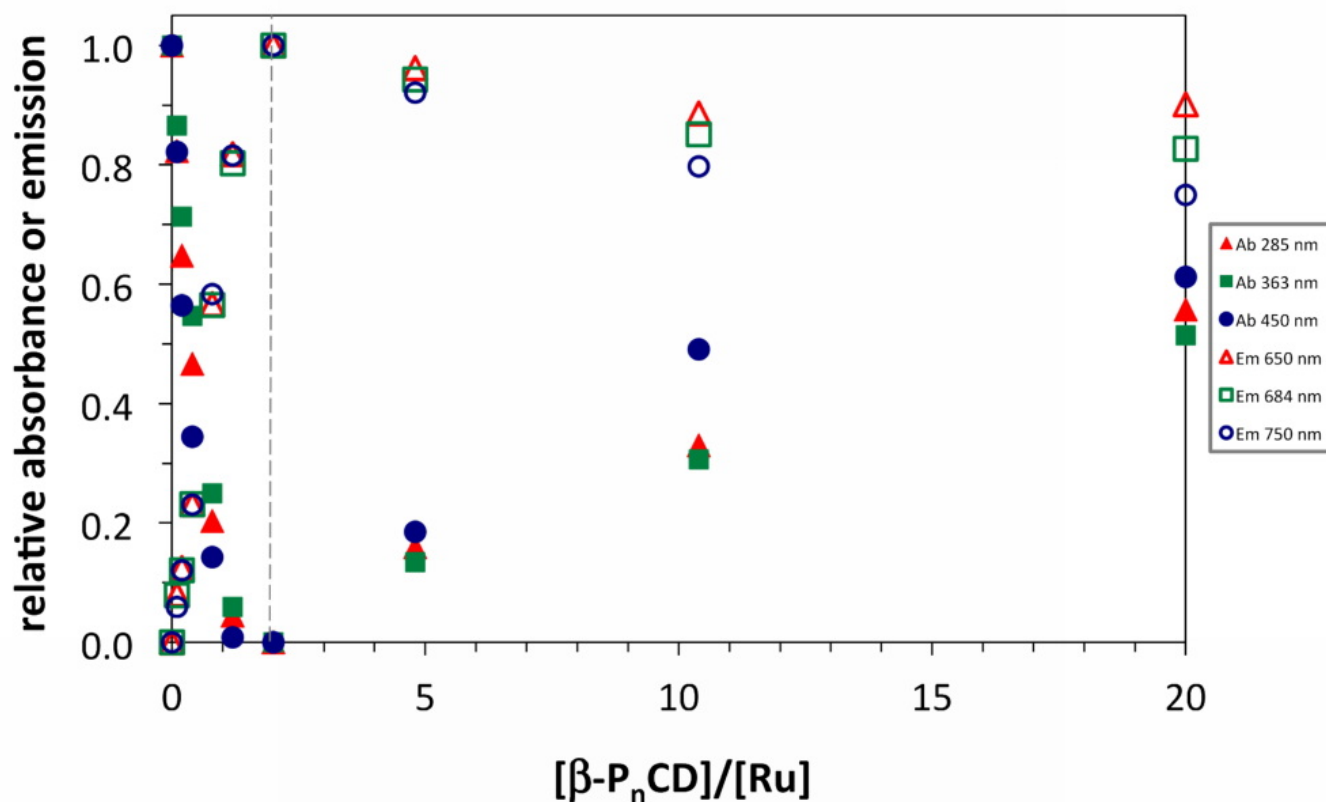

**Figure S14.** Normalized absorption and emission changes of  $\Delta$ -[Ru(bpy)<sub>2</sub>dppz]<sup>2+</sup> as a function of added  $\beta$ -P<sub>n</sub>CD. [Ru] = 20  $\mu$ M. The legend shows the monitored wavelengths.

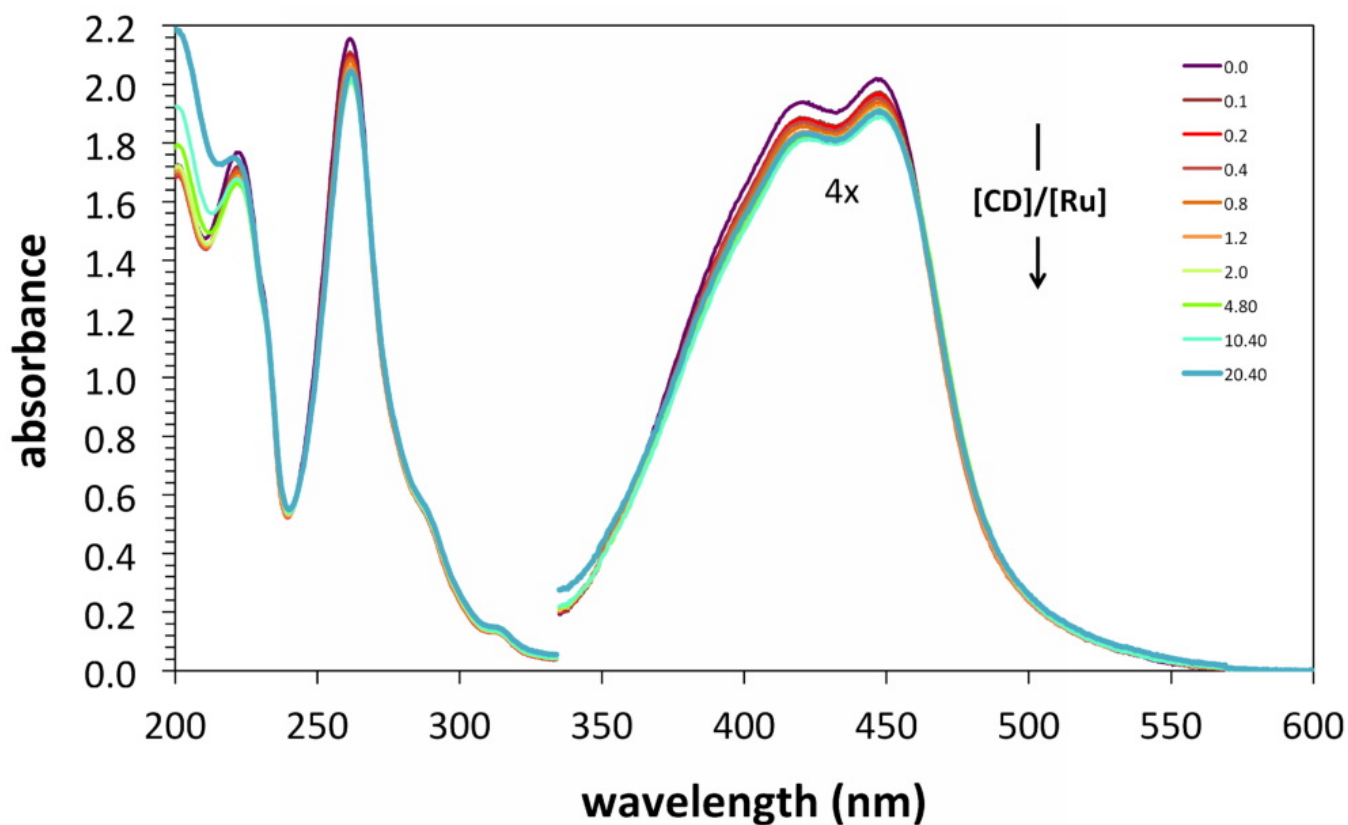

**Figure S15.** Absorption spectra of  $\Delta$ -[Ru(phen)<sub>3</sub>]<sup>2+</sup> with added  $\beta$ -CD-phosphate. [Ru] = 20  $\mu$ M. Legend shows [ $\beta$ -P<sub>n</sub>CD]/[Ru] ratios.

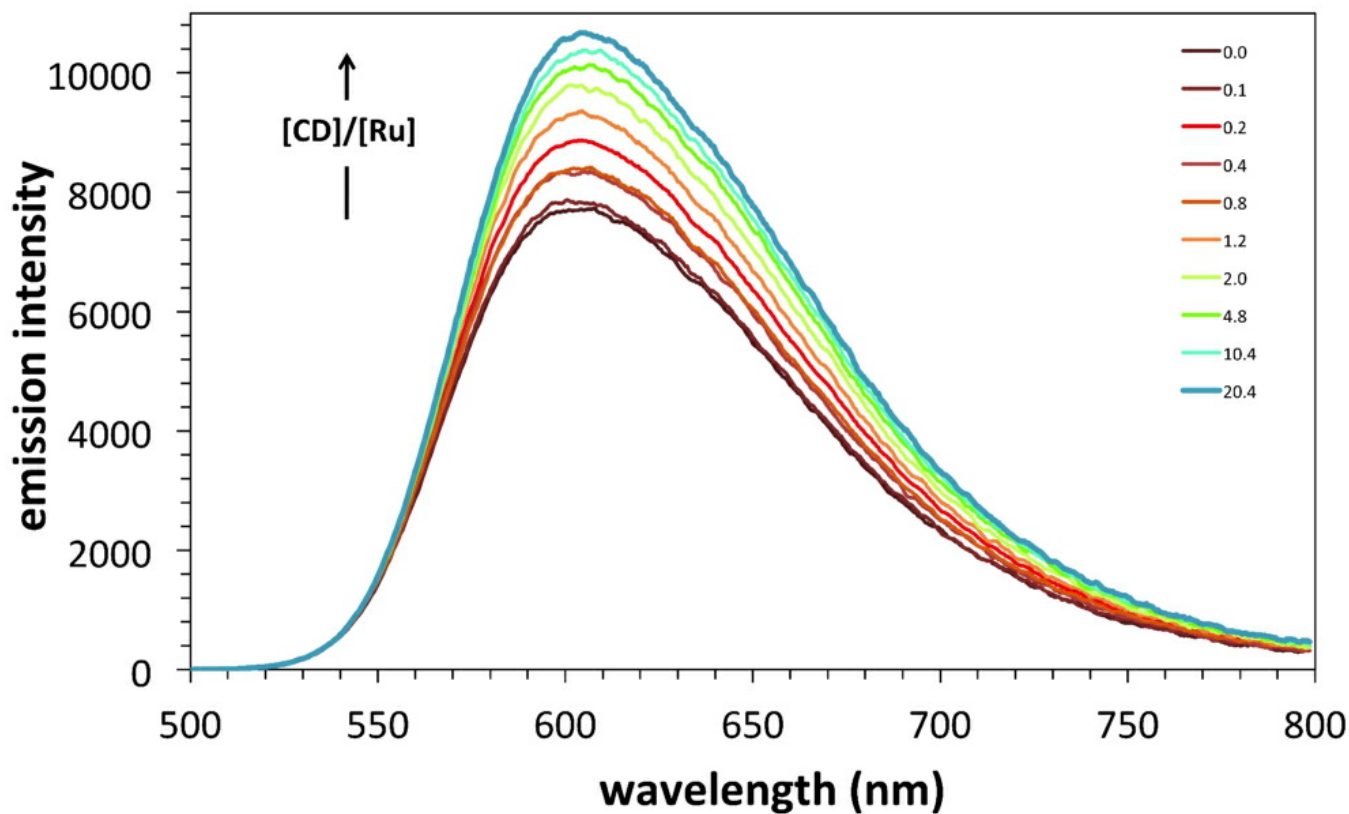

**Figure S16.** Emission spectra of  $\Delta$ -[Ru(phen)<sub>3</sub>]<sup>2+</sup> with added  $\beta$ -P<sub>n</sub>CD.  $\lambda_{\text{ex}}$  = 470 nm. [Ru] = 20  $\mu$ M. Legend shows [ $\beta$ -P<sub>n</sub>CD]/[Ru] ratios.

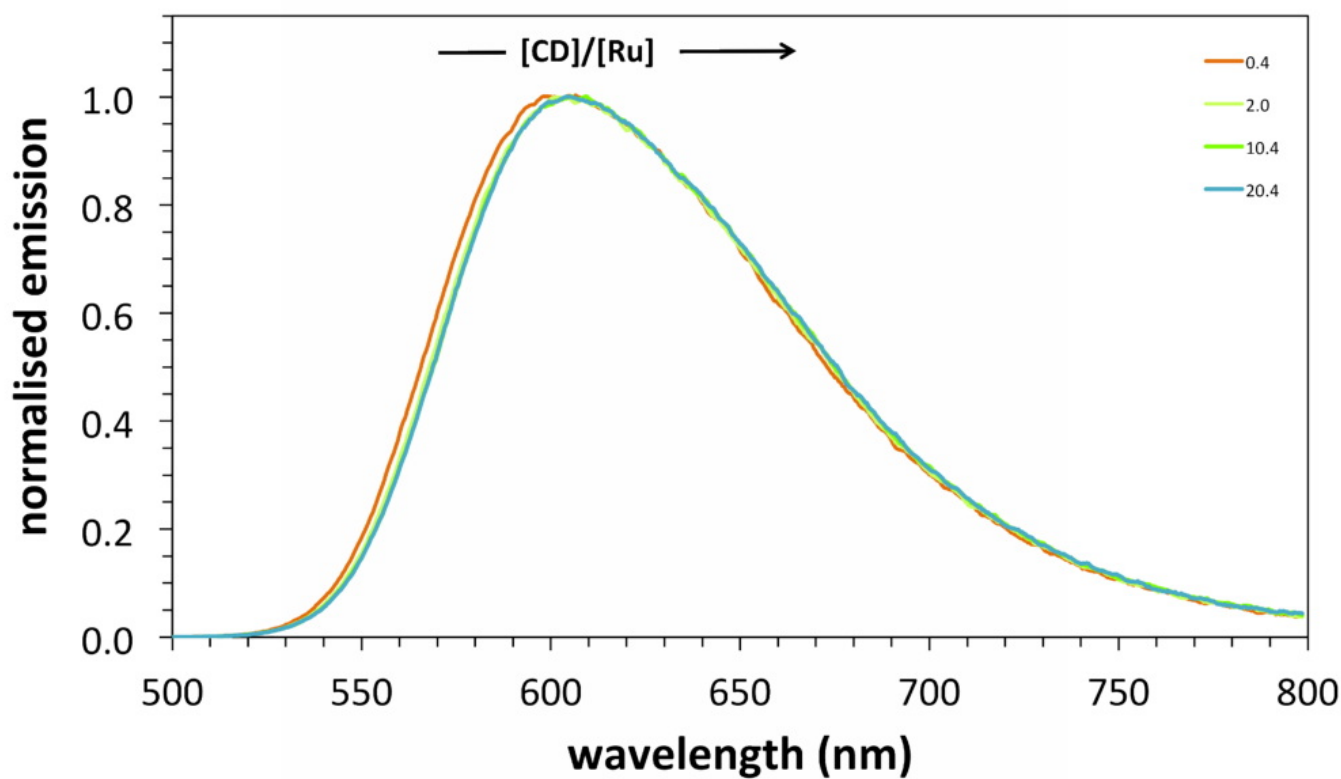

**Figure S17.** Normalised emission spectra of  $\Delta$ -[Ru(phen)<sub>3</sub>]<sup>2+</sup> with added  $\beta$ -P<sub>n</sub>CD.  $\lambda_{\text{ex}} = 470$  nm. [Ru] = 20  $\mu$ M. Legend shows [ $\beta$ -P<sub>n</sub>CD]/[Ru] ratios.

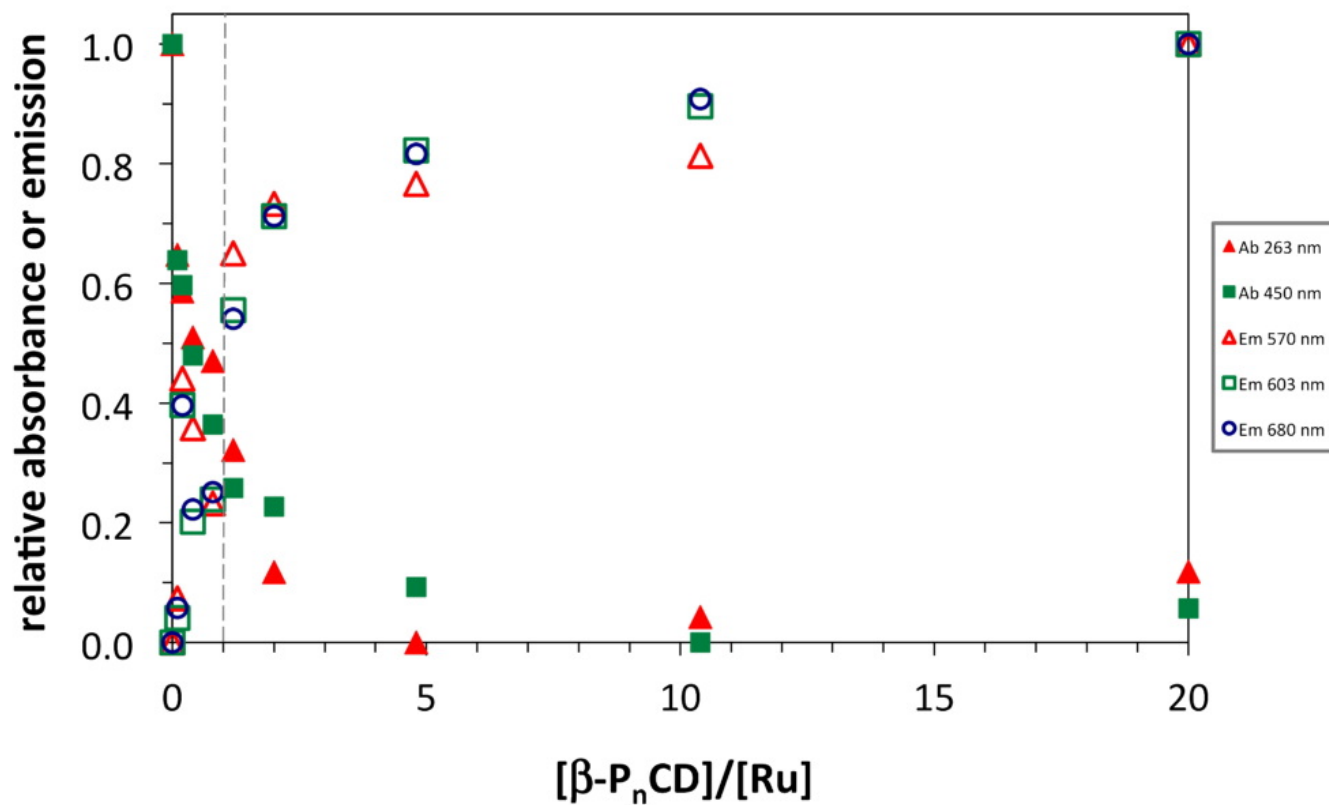

**Figure S18.** Normalized absorption and emission changes of  $\Delta$ -[Ru(phen)<sub>3</sub>]<sup>2+</sup> as a function of added  $\beta$ -P<sub>n</sub>CD. [Ru] = 20  $\mu$ M. The legend shows the monitored wavelengths.

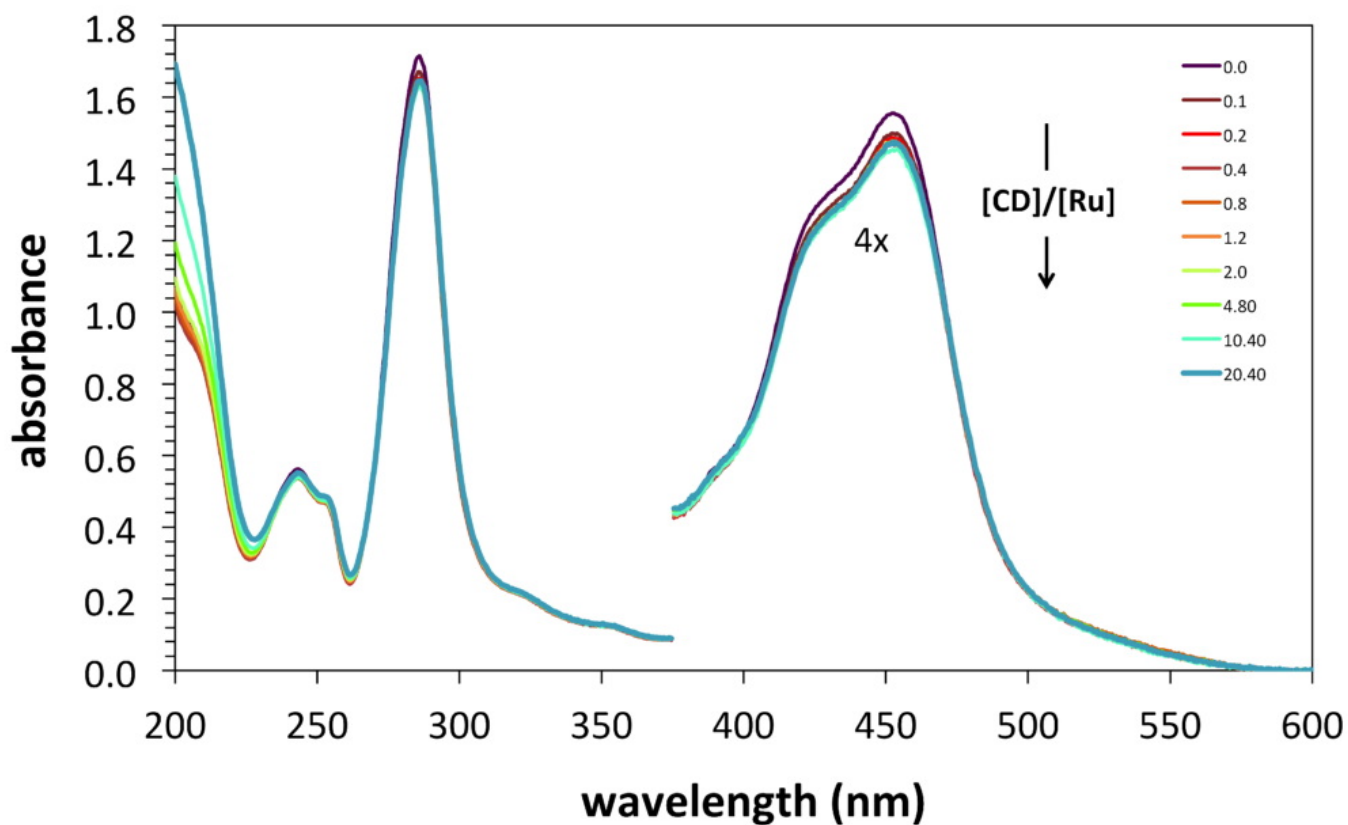

**Figure S19.** Absorption spectra of  $\Delta$ -[Ru(bpy)<sub>3</sub>]<sup>2+</sup> with added  $\beta$ -CD-phosphate. [Ru] = 20  $\mu$ M. Legend shows [ $\beta$ -P<sub>n</sub>CD]/[Ru] ratios.

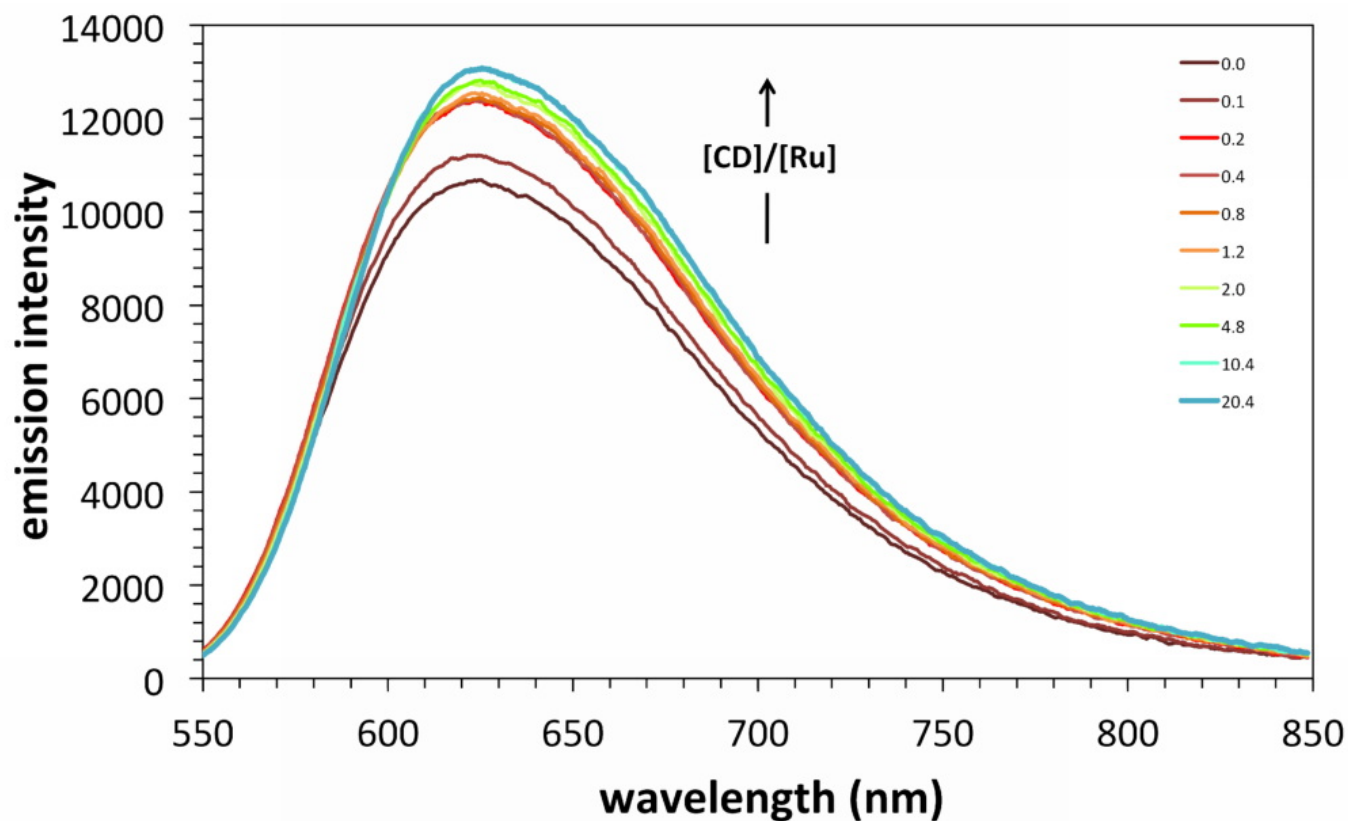

**Figure S20.** Emission spectra of  $\Delta$ -[Ru(bpy)<sub>3</sub>]<sup>2+</sup> with added  $\beta$ -CD-phosphate.  $\lambda_{\text{ex}}$  = 470 nm. [Ru] = 20  $\mu$ M. Legend shows [ $\beta$ -P<sub>n</sub>CD]/[Ru] ratios.

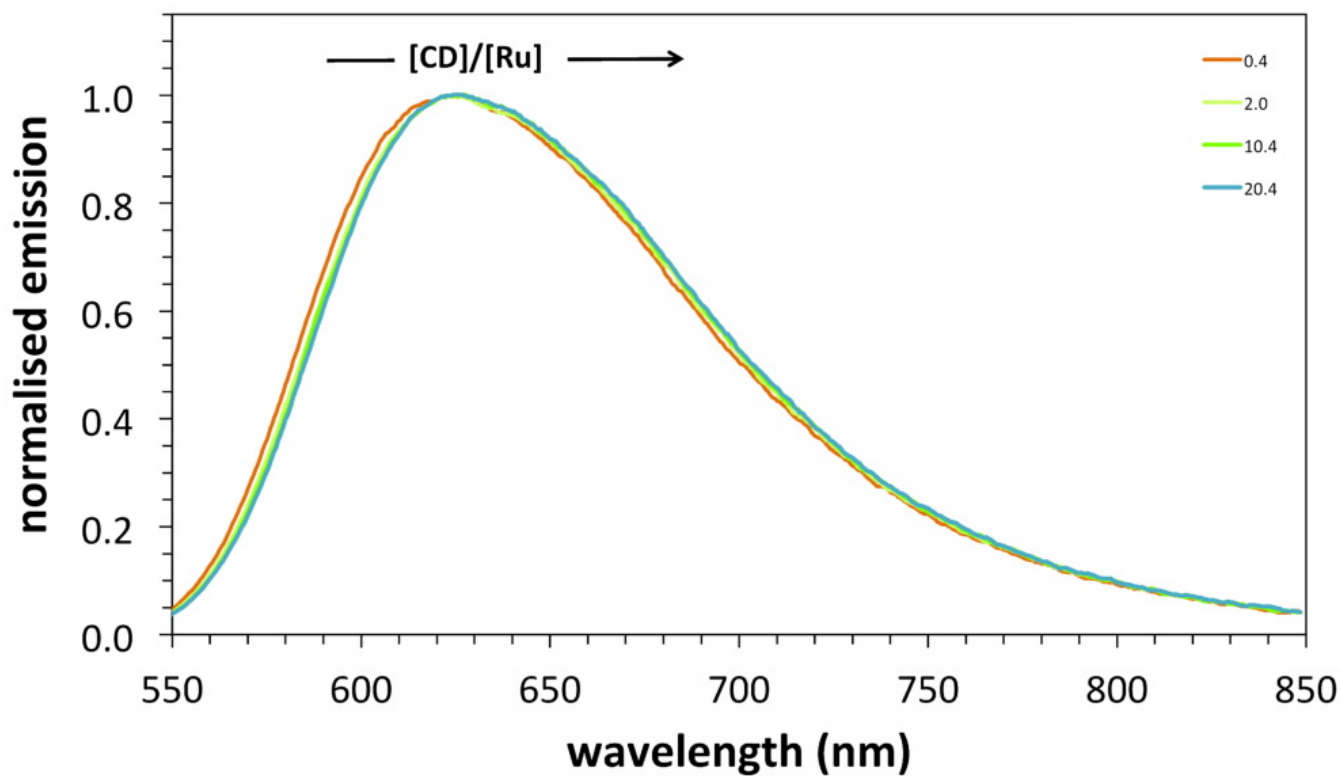

**Figure S21.** Normalised emission spectra of  $\Delta$ -[Ru(bpy)<sub>3</sub>]<sup>2+</sup> with added  $\beta$ -CD-phosphate.  $\lambda_{\text{ex}} = 470$  nm. [Ru] = 20  $\mu\text{M}$ . Legend shows  $[\beta\text{-P}_n\text{CD}]/[\text{Ru}]$  ratios.

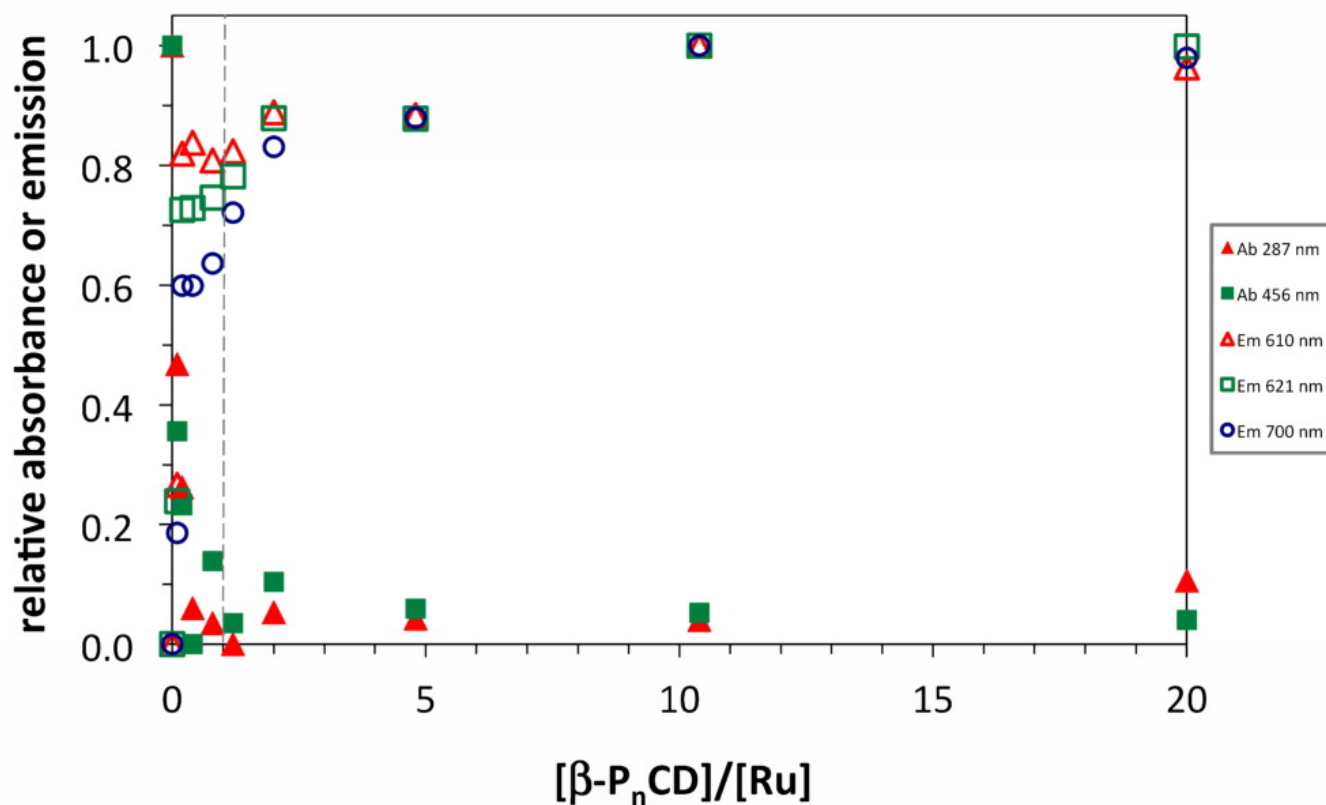

**Figure S22.** Relative intensities of  $\Delta$ -[Ru(bpy)<sub>3</sub>]<sup>2+</sup> with added  $\beta$ -CD-phosphate. [Ru] = 20  $\mu\text{M}$ . Legend shows  $[\beta\text{-P}_n\text{CD}]/[\text{Ru}]$  ratios.

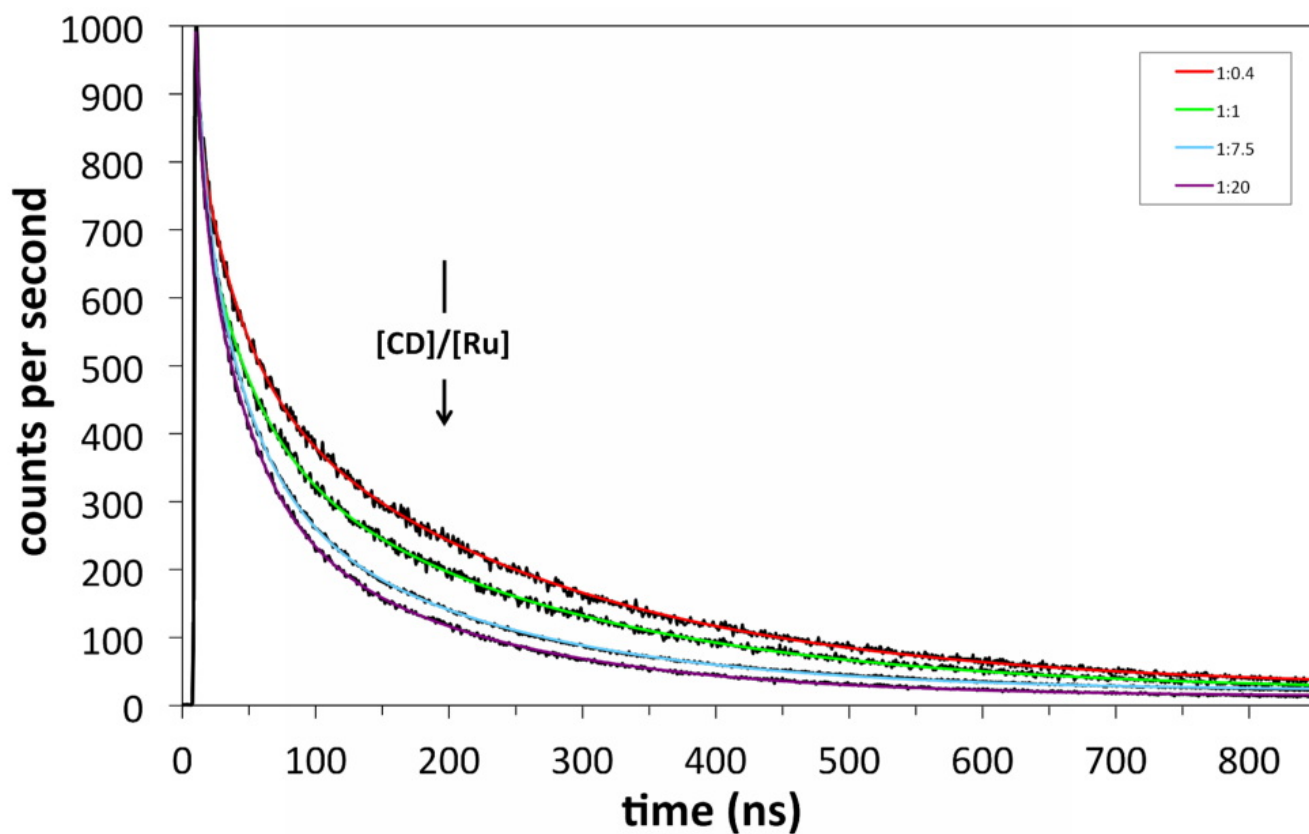

**Figure S23.** Single photon counting decays for  $\Delta$ -[Ru(phen)<sub>2</sub>dppz]<sup>2+</sup> with added  $\beta$ -CD-phosphate, with tri-exponential fits overlaid.  $\lambda_{\text{ex}} = 405 \text{ nm}$  /  $\lambda_{\text{em}} = 625 \text{ nm}$ . [Ru] = 20  $\mu\text{M}$ . Legend shows [ $\beta$ -P<sub>n</sub>CD]/[Ru] ratios.

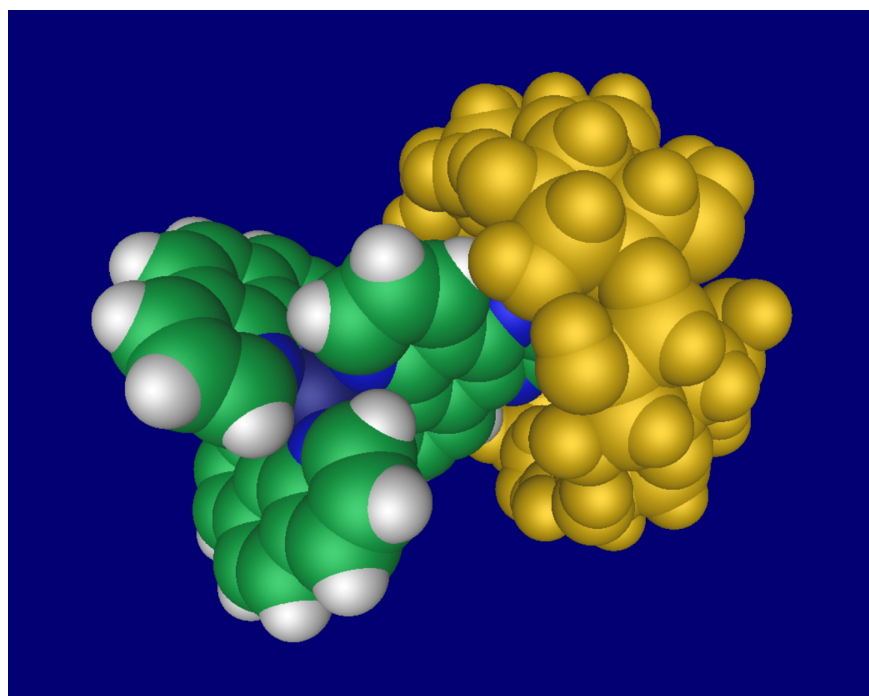

**Figure S24.** Model of the 1:1 docking complex formed between  $\Delta$ -[Ru(phen)<sub>2</sub>dppz]<sup>2+</sup> and  $\beta$ -CD. The metal complex geometry was minimized using the SPARTAN 04 programme and was docked into the cyclodextrin cavity using iMol.

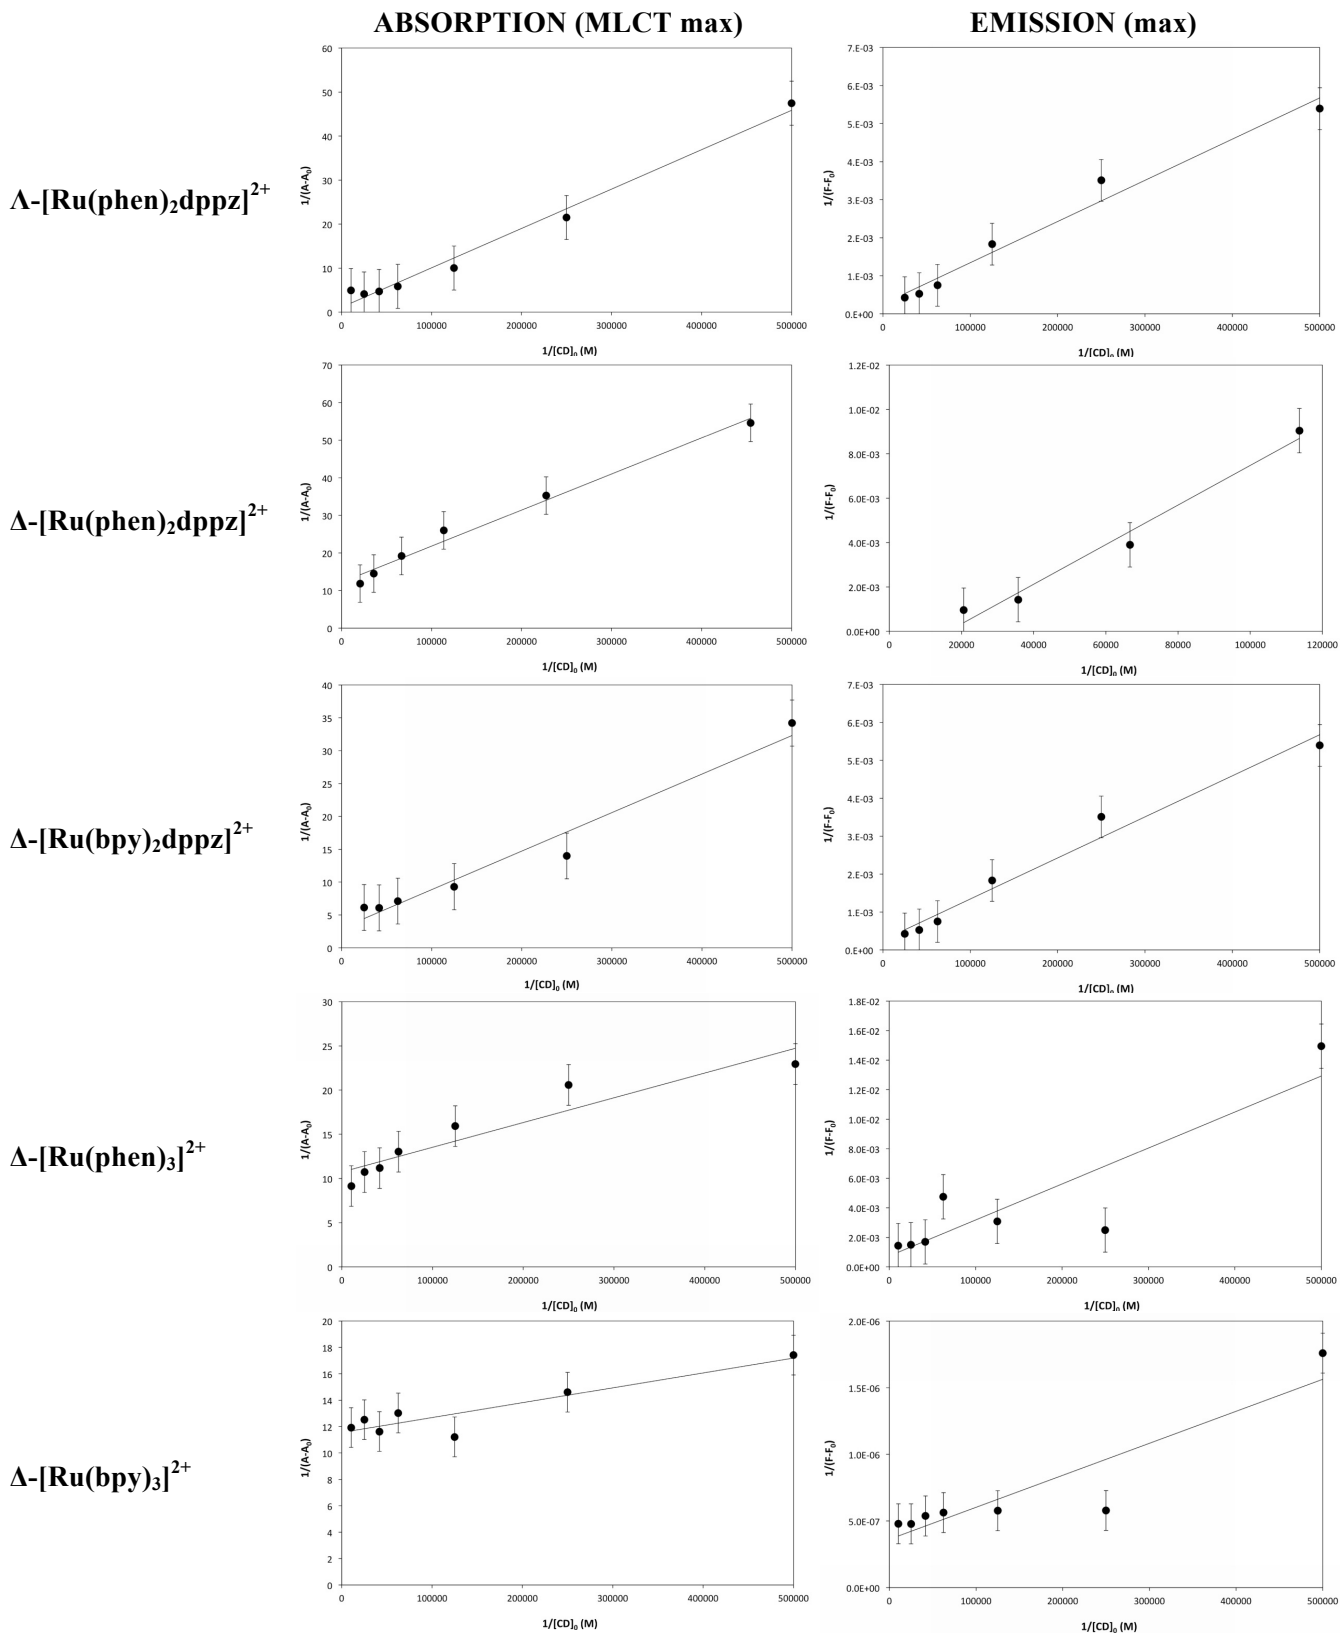

Figure S25. Benesi-Hildebrand binding plots at low binding ratios.
